# Supplementary material
Source: HighWire-hosted journal article supplement (doi:10.1101/rna.030841.111)
Supplement: Chatterjee_Supplemental_Tables1-3.docx [file Chatterjee_Supplemental_Tables1-3.docx]

**Supplemental Tables**

**Table S1 - Strains**

| **Strain** | **Genotype** | **Reference** |
| --- | --- | --- |
| *E. coli* Top10 DH5 | | F- *mcr*A Δ(*mrr*-*hsd*RMS-*mcr*BC) φ80*lac*ZΔM15 Δ*lac*Χ74 *rec*A1 *ara*D139 Δ(*ara*-*leu*) 7697 *gal*U *gal*K *rps*L (StrR) *end*A1 *nup*G λ- | | --- | | Invitrogen, CA |
| *E. coli* *inv110* | F´ {*tra*Δ*36 proAB lac*I*q lacZ*Δ*M15*} *rps*L (StrR) *thr leu end*A *thi*-1  *lacY galK galT ara ton*A *tsx dam dcm supE44* Δ*(lac-proAB)*  Δ*(mcr*C*-mrr)102*::Tn*10* (TetR) | Invitrogen, CA |
| *E. coli* BL21 (DE3) | F– ompT *gal dcm lon hsd*SB(rB- mB-) λ(DE3 [*lacI lac*UV5-T7 gene 1 i*nd1* *sam7 nin5]*) | ([Studier and Moffatt 1986](#_ENREF_62)) |
| *H. volcanii* DS70 |  | ([Wendoloski et al. 2001](#_ENREF_70)) |
| *H. volcanii* H26 | DS70 Δ*pyrE2* | ([Allers et al. 2004](#_ENREF_2)) |
| VDC2376 | H26 Δ*HVO_1989* | This work |
| VDC2604 | H26 Δ*HVO_1989* pIKB421 | This work |

**Table S2 - Plasmids**

| **Plasmids** | **Description** | **Reference** |
| --- | --- | --- |
| pTA131 | AmpR, ColE1 | ([Allers et al. 2004](#_ENREF_2)) |
| pJAM202 | *H. volcanii* shuttle vector, NovR | ([Kaczowka and Maupin-Furlow 2003](#_ENREF_40)) |
| pIKB227 | 649 bp upstream and 610 bp downstream of *HVO_1989* recombined between the *Eco*RI and *Xho*I sites of pTA131 | This work |
| pIKB421 | 591 bp fragment encoding *VNG_1980C* inserted between the *Blp*I and *Nde*I sites of pJAM202 | This work |
| pET28Mj1640 | Mj1640 expressing clone KmR*,* ColE1 | ([Chen and Yuan 2010](#_ENREF_13)) |

**Table S3 - Oligonucleotides**

| **Oligo** | **Sequence** | **Function** |
| --- | --- | --- |
| HVO_1989_N_IfKO_Fwd | cgggccccccctcgagcgacgaggtcgtgttcc | Amplification of region upstream of *HVO_1989* |
| HVO_1989_N_IfKO_Rev | gacgcgttcatatgcatgtcgtcgagcgagaagtc |
| HVO_1989_C_IfKO_Fwd | gcatatgaacgcgtcattacggtcgcgcacaacta | Amplification of region downstream of *HVO_1989* |
| HVO_1989_C_IfKO_Rev | cgggctgcaggaattcttgcaacgactgtccaaaac |
| HvO_1989_Int_F | tctgtcgctgtgtcaactcc | Internal checks for *HVO_1989* deletion |
| HvO_1989_Int_R | gtccgagaggacgaaaagc |
| HvO_1989_Ext_F | aacggccatcaggtgaagta | External checks for *HVO_1989* deletion |
| HvO_1989_Ext_R | gtcagccgcgtgaagatg |
| Hsal_cog1901_Fwd | atgct catatg atgagacagttcgtcgtcct | Amplification of VNG1980C from *Halobacterium* sp. NRC-1 for insertion into pJAM202. |
| Hsal_cog1901_Rev | atgct gctcagc tcagtacgcgtcgaacccgg |
| Met-CCA2 | tggtgcccggggtgggc | To characterize residue at position 54 of tRNAMet by CMCT-RT reaction |
